# Supplementary material for: A hydrogen storage nanotank: lithium-organic pillared graphite
Source: Royal Society of Chemistry journal article supplement (doi:10.1039/b910823h), 2009-01-01
Supplement: b910823h.pdf [file b910823h.pdf]

## A hydrogen storage nanotank: lithium-organic pillared graphite

Sang Soo Han<sup>\*a</sup> and Seung Soon Jang<sup>b</sup>

<sup>a</sup> Korea Research Institute of Standards and Science, 209 Gajeong-Ro, Yuseong-Gu, Daejeon  
305-340, Republic of Korea

<sup>b</sup> Computational NanoBio Technology Laboratory, School of Materials Science and Engineering,  
Georgia Institute of Technology, Atlanta, GA 30332-0245, U.S.A.

\* To whom correspondence should be addressed.

E-mail: sangsoo@kriss.re.kr

### Supporting Material

---

|                                                                                                                       |     |
|-----------------------------------------------------------------------------------------------------------------------|-----|
| Force fields used in grand canonical Monte-Carlo simulation                                                           | S2  |
| Fitting of Force Fields for Li <sup>+</sup> -Tetrahydrofuran                                                          | S3  |
| Simulated hydrogen storage capacity for compound <b>1</b> at 77 and 300 K                                             | S4  |
| Simulated hydrogen storage capacity for compound <b>2</b> at 77 and 300 K                                             | S5  |
| Simulated hydrogen storage capacity<br>for compound <b>Li-1</b> with a LiC <sub>6</sub> concentration at 77 and 300 K | S6  |
| Simulated hydrogen storage capacity<br>for compound <b>Li-2</b> with a LiC <sub>6</sub> concentration at 77 and 300 K | S7  |
| Simulated hydrogen storage capacity<br>for compound <b>Li-1</b> with a LiC <sub>3</sub> concentration at 77 and 300 K | S8  |
| Simulated hydrogen storage capacity<br>for compound <b>Li-1</b> with a LiC <sub>3</sub> concentration at 77 and 300 K | S9  |
| H <sub>2</sub> adsorption sites in lithium-organic pillared graphite                                                  | S10 |
| References                                                                                                            | S11 |

### S.1 Force fields used in grand canonical Monte-Carlo simulations

In performing the grand canonical Monte-Carlo (GCMC) simulation, force fields (FFs) developed by Deng et al.<sup>1</sup> and Han et al.<sup>2,3</sup> were used for the van der Waals (vdW) interactions between H<sub>2</sub> and Li-organic-GIC sorbent. The FFs (Table 1) were Morse potential types (equation 1) with the parameters determined by fitting to accurate *ab initio* calculations. For the H\_A---H\_A (H\_A indicates hydrogen atom in a H<sub>2</sub> molecule) vdW term, the potential curves were fitted between two H<sub>2</sub> molecules using CCSD(T) with the aug-cc-pVQZ basis set.<sup>1</sup> For the C\_3---H\_A (C\_3 indicates *sp*<sup>3</sup> carbon) vdW term, the interaction between H<sub>2</sub> and C<sub>2</sub> molecules were calculated using the MP4 method with aug-cc-pVTZ basis set plus midpoint bond functions.<sup>1</sup> For the C\_R---H\_A (C\_R indicates aromatic *sp*<sup>2</sup> carbon) and H\_---H\_A (H\_ indicates hydrogen atom bonded to carbon atoms) vdW terms, the potential curves were fitted between a benzene (C<sub>6</sub>H<sub>6</sub>) and a H<sub>2</sub> molecule by a combination of the MP2 method and triple zeta valence basis supplemented with polarization functions from the cc-pVTZ basis, which is denoted as TZVPP.<sup>2</sup> For the O---H\_A vdW term, the interaction between boroxine (B<sub>3</sub>O<sub>3</sub>) and H<sub>2</sub> molecules were calculated using the MP2 method with the QZVPP basis set.<sup>3</sup> And to determine the interactions between doped Li ions and hydrogen molecules, considered was a planar C<sub>32</sub> cluster (ten aromatic rings) doped with one Li atom on each side to which one H<sub>2</sub> was bonded.<sup>1</sup> With this methodology, the first author (SSH) s work successfully showed a good agreement between theoretical and experimental results on hydrogen storage in various metal-organic frameworks and covalent-organic frameworks.<sup>2-7</sup>

$$U_{ij}(r_{ij}) = D \left\{ \exp\left[\alpha\left(1 - \frac{r_{ij}}{r_o}\right)\right] - 2 \cdot \exp\left[\frac{\alpha}{2}\left(1 - \frac{r_{ij}}{r_o}\right)\right] \right\} \quad (1)$$

**Table S1.** vdW force field parameters obtained from QM data. Here, C\_R and C\_3 mean  $sp^2$  and  $sp^3$  carbon atoms, respectively. And H\_ indicates hydrogen bonded to carbon atoms in tetrahydrofuran or 2,5-dihydrofuran and H\_A indicates hydrogen in a  $H_2$  molecule.

| Term      | D (kcal/mol) | $r_0$ (Å) | $\alpha$ |
|-----------|--------------|-----------|----------|
| C_R---H_A | 0.10082      | 3.12022   | 12.00625 |
| C_3---H_A | 0.03594      | 3.74425   | 12.16757 |
| H_---H_A  | 0.00087      | 3.24722   | 12.00625 |
| H_A---H_A | 0.01815      | 3.56980   | 10.70940 |
| O---H_A   | 0.02515      | 3.32249   | 12.00187 |
| Li---H_A  | 2.15752      | 2.01844   | 7.12510  |

### S.2 Fitting of Force Fields for $Li^+$ -Tetrahydrofuran

In this work, we investigated an optimized structure of a ternary Li-THF(tetrahydrofuran)-GIC(graphite intercalation compound) by molecular dynamics simulation with DREIDING FF. To more accurately describe interaction between Li and THF, we developed a FF for lithium-oxygen bond stretch with the Morse potential where the parameters were determined by fitting to density functional theory (X3LYP level) with 6-311G\*\* basis set, which is shown in Fig. S1.

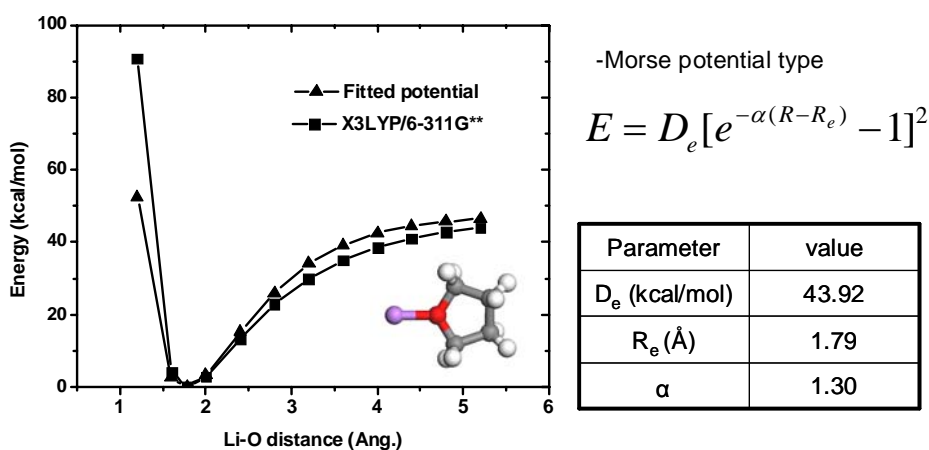

**Figure S1.** Fitted Li<sup>+</sup>-O bond stretch function from DFT calculations. Here color code is pink=Li, red=O, gray=C, and white=H.

S.3 Simulated hydrogen storage capacity for compound **1** at 77 and 300 K.

| Compound <b>1</b> (77 K) |                          |       |                                        |       |
|--------------------------|--------------------------|-------|----------------------------------------|-------|
| Pressure<br>(bar)        | Gravimetric uptake (wt%) |       | Volumetric uptake (kg/m <sup>3</sup> ) |       |
|                          | excess                   | total | excess                                 | total |
| 1                        | 1.52                     | 1.53  | 11.78                                  | 11.83 |
| 5                        | 2.31                     | 2.32  | 18.01                                  | 18.14 |
| 10                       | 2.85                     | 2.87  | 22.37                                  | 22.59 |
| 20                       | 3.11                     | 3.16  | 24.51                                  | 24.93 |
| 30                       | 3.29                     | 3.36  | 25.97                                  | 26.57 |
| 40                       | 3.33                     | 3.43  | 26.32                                  | 27.11 |
| 50                       | 3.39                     | 3.51  | 26.77                                  | 27.75 |
| 100                      | 3.55                     | 3.76  | 28.06                                  | 29.83 |

| Compound <b>1</b> (300 K) |                          |       |                                        |       |
|---------------------------|--------------------------|-------|----------------------------------------|-------|
| Pressure<br>(bar)         | Gravimetric uptake (wt%) |       | Volumetric uptake (kg/m <sup>3</sup> ) |       |
|                           | excess                   | total | excess                                 | total |
| 1                         | 0.01                     | 0.01  | 0.06                                   | 0.09  |
| 5                         | 0.03                     | 0.04  | 0.22                                   | 0.30  |
| 10                        | 0.06                     | 0.07  | 0.44                                   | 0.57  |
| 20                        | 0.12                     | 0.14  | 0.89                                   | 1.10  |
| 30                        | 0.17                     | 0.21  | 1.30                                   | 1.60  |
| 40                        | 0.22                     | 0.27  | 1.70                                   | 2.08  |
| 50                        | 0.27                     | 0.33  | 2.06                                   | 2.54  |
| 100                       | 0.47                     | 0.59  | 3.62                                   | 4.52  |

S.4 Simulated hydrogen storage capacity for compound **2** at 77 and 300 K.

| Compound <b>2</b> (77 K) |                          |       |                                        |       |
|--------------------------|--------------------------|-------|----------------------------------------|-------|
| Pressure<br>(bar)        | Gravimetric uptake (wt%) |       | Volumetric uptake (kg/m <sup>3</sup> ) |       |
|                          | excess                   | total | excess                                 | total |
| 1                        | 1.69                     | 1.70  | 15.17                                  | 15.22 |
| 5                        | 2.55                     | 2.56  | 23.04                                  | 23.19 |
| 10                       | 2.78                     | 2.81  | 25.24                                  | 25.49 |
| 20                       | 2.98                     | 3.03  | 27.07                                  | 27.53 |
| 30                       | 3.08                     | 3.15  | 27.97                                  | 28.66 |
| 40                       | 3.15                     | 3.25  | 28.69                                  | 29.58 |
| 50                       | 3.16                     | 3.27  | 28.69                                  | 29.80 |
| 100                      | 3.22                     | 3.43  | 29.31                                  | 31.33 |

| Compound <b>2</b> (300 K) |                          |       |                                        |       |
|---------------------------|--------------------------|-------|----------------------------------------|-------|
| Pressure<br>(bar)         | Gravimetric uptake (wt%) |       | Volumetric uptake (kg/m <sup>3</sup> ) |       |
|                           | excess                   | total | excess                                 | total |
| 1                         | 0.01                     | 0.01  | 0.07                                   | 0.10  |
| 5                         | 0.03                     | 0.04  | 0.26                                   | 0.35  |
| 10                        | 0.06                     | 0.07  | 0.54                                   | 0.67  |
| 20                        | 0.12                     | 0.15  | 1.04                                   | 1.30  |
| 30                        | 0.18                     | 0.21  | 1.58                                   | 1.90  |
| 40                        | 0.23                     | 0.27  | 2.01                                   | 2.43  |
| 50                        | 0.27                     | 0.33  | 2.42                                   | 2.93  |
| 100                       | 0.47                     | 0.58  | 4.16                                   | 5.13  |

S.5 Simulated hydrogen storage capacity for compound **Li-1** with a  $\text{LiC}_6$  concentration at 77 and 300 K.

| Compound <b>Li-1</b> (77 K, $\text{LiC}_6$ ) |                          |       |                                        |       |
|----------------------------------------------|--------------------------|-------|----------------------------------------|-------|
| Pressure<br>(bar)                            | Gravimetric uptake (wt%) |       | Volumetric uptake (kg/m <sup>3</sup> ) |       |
|                                              | excess                   | total | excess                                 | total |
| 1                                            | 4.07                     | 4.08  | 34.71                                  | 34.75 |
| 5                                            | 4.48                     | 4.49  | 38.32                                  | 38.46 |
| 10                                           | 4.65                     | 4.68  | 39.90                                  | 40.12 |
| 20                                           | 4.77                     | 4.81  | 40.99                                  | 41.35 |
| 30                                           | 4.90                     | 4.95  | 42.11                                  | 42.60 |
| 40                                           | 4.96                     | 5.03  | 42.72                                  | 43.34 |
| 50                                           | 4.96                     | 5.04  | 42.66                                  | 43.44 |
| 100                                          | 5.05                     | 5.20  | 43.47                                  | 44.89 |

| Compound <b>Li-1</b> (300 K, $\text{LiC}_6$ ) |                          |       |                                        |       |
|-----------------------------------------------|--------------------------|-------|----------------------------------------|-------|
| Pressure<br>(bar)                             | Gravimetric uptake (wt%) |       | Volumetric uptake (kg/m <sup>3</sup> ) |       |
|                                               | excess                   | total | excess                                 | total |
| 1                                             | 0.64                     | 0.64  | 5.27                                   | 5.29  |
| 5                                             | 1.23                     | 1.24  | 10.16                                  | 10.25 |
| 10                                            | 1.50                     | 1.52  | 12.48                                  | 12.62 |
| 20                                            | 1.79                     | 1.82  | 14.92                                  | 15.14 |
| 30                                            | 1.99                     | 2.03  | 16.62                                  | 16.91 |
| 40                                            | 2.10                     | 2.14  | 17.55                                  | 17.91 |
| 50                                            | 2.21                     | 2.26  | 18.47                                  | 18.89 |
| 100                                           | 2.54                     | 2.63  | 21.28                                  | 22.06 |

S.5 Simulated hydrogen storage capacity for compound **Li-2** with a LiC<sub>6</sub> concentration at 77 and 300 K.

| Compound <b>Li-2</b> (77 K, LiC <sub>6</sub> ) |                          |       |                                        |       |
|------------------------------------------------|--------------------------|-------|----------------------------------------|-------|
| Pressure<br>(bar)                              | Gravimetric uptake (wt%) |       | Volumetric uptake (kg/m <sup>3</sup> ) |       |
|                                                | excess                   | total | excess                                 | total |
| 1                                              | 4.11                     | 4.11  | 40.50                                  | 40.55 |
| 5                                              | 4.28                     | 4.29  | 42.28                                  | 42.42 |
| 10                                             | 4.36                     | 4.39  | 43.13                                  | 43.36 |
| 20                                             | 4.44                     | 4.48  | 43.98                                  | 44.35 |
| 30                                             | 4.53                     | 4.58  | 44.84                                  | 45.35 |
| 40                                             | 4.53                     | 4.59  | 44.84                                  | 45.48 |
| 50                                             | 4.53                     | 4.61  | 44.87                                  | 45.65 |
| 100                                            | 4.56                     | 4.70  | 45.19                                  | 46.62 |

| Compound <b>Li-2</b> (300 K, LiC <sub>6</sub> ) |                          |       |                                        |       |
|-------------------------------------------------|--------------------------|-------|----------------------------------------|-------|
| Pressure<br>(bar)                               | Gravimetric uptake (wt%) |       | Volumetric uptake (kg/m <sup>3</sup> ) |       |
|                                                 | excess                   | total | excess                                 | total |
| 1                                               | 0.76                     | 0.76  | 7.24                                   | 7.27  |
| 5                                               | 1.35                     | 1.36  | 12.95                                  | 13.04 |
| 10                                              | 1.64                     | 1.65  | 15.76                                  | 15.91 |
| 20                                              | 1.92                     | 1.95  | 18.55                                  | 18.78 |
| 30                                              | 2.11                     | 2.14  | 20.39                                  | 20.70 |
| 40                                              | 2.25                     | 2.29  | 21.76                                  | 22.13 |
| 50                                              | 2.32                     | 2.37  | 22.49                                  | 22.93 |
| 100                                             | 2.60                     | 2.68  | 25.22                                  | 26.00 |

S.6 Simulated hydrogen storage capacity for compound **Li-1** with a  $\text{LiC}_3$  concentration at 77 and 300 K.

| Compound <b>Li-1</b> (77 K, $\text{LiC}_3$ ) |                          |       |                                        |       |
|----------------------------------------------|--------------------------|-------|----------------------------------------|-------|
| Pressure<br>(bar)                            | Gravimetric uptake (wt%) |       | Volumetric uptake (kg/m <sup>3</sup> ) |       |
|                                              | excess                   | total | excess                                 | total |
| 1                                            | 4.54                     | 4.54  | 41.49                                  | 41.50 |
| 5                                            | 4.70                     | 4.71  | 43.09                                  | 43.12 |
| 10                                           | 4.73                     | 4.74  | 43.38                                  | 43.44 |
| 20                                           | 4.75                     | 4.77  | 43.57                                  | 43.67 |
| 30                                           | 4.77                     | 4.78  | 43.69                                  | 43.83 |
| 40                                           | 4.78                     | 4.79  | 43.76                                  | 43.94 |
| 50                                           | 4.78                     | 4.81  | 43.85                                  | 44.05 |
| 100                                          | 4.79                     | 4.82  | 43.86                                  | 44.22 |

| Compound <b>Li-1</b> (300 K, $\text{LiC}_3$ ) |                          |       |                                        |       |
|-----------------------------------------------|--------------------------|-------|----------------------------------------|-------|
| Pressure<br>(bar)                             | Gravimetric uptake (wt%) |       | Volumetric uptake (kg/m <sup>3</sup> ) |       |
|                                               | excess                   | total | excess                                 | total |
| 1                                             | 2.63                     | 2.63  | 23.56                                  | 23.57 |
| 5                                             | 3.11                     | 3.11  | 28.01                                  | 28.05 |
| 10                                            | 3.32                     | 3.33  | 29.99                                  | 30.04 |
| 20                                            | 3.47                     | 3.48  | 31.35                                  | 31.43 |
| 30                                            | 3.56                     | 3.58  | 32.25                                  | 32.36 |
| 40                                            | 3.62                     | 3.64  | 32.80                                  | 32.94 |
| 50                                            | 3.65                     | 3.67  | 33.05                                  | 33.22 |
| 100                                           | 3.77                     | 3.80  | 34.15                                  | 34.45 |



S.7 Simulated hydrogen storage capacity for compound **Li-2** with a  $\text{LiC}_3$  concentration at 77 and 300 K.

| Compound <b>Li-2</b> (77 K, $\text{LiC}_3$ ) |                          |       |                                        |       |
|----------------------------------------------|--------------------------|-------|----------------------------------------|-------|
| Pressure<br>(bar)                            | Gravimetric uptake (wt%) |       | Volumetric uptake (kg/m <sup>3</sup> ) |       |
|                                              | excess                   | total | excess                                 | total |
| 1                                            | 4.79                     | 4.79  | 50.80                                  | 50.82 |
| 5                                            | 4.85                     | 4.86  | 51.45                                  | 51.53 |
| 10                                           | 4.90                     | 4.91  | 52.00                                  | 52.12 |
| 20                                           | 4.96                     | 4.98  | 52.67                                  | 52.87 |
| 30                                           | 4.98                     | 5.01  | 52.92                                  | 53.22 |
| 40                                           | 4.99                     | 5.02  | 52.97                                  | 53.35 |
| 50                                           | 4.98                     | 5.03  | 52.95                                  | 53.42 |
| 100                                          | 4.97                     | 5.04  | 52.73                                  | 53.61 |

| Compound <b>Li-2</b> (300 K, $\text{LiC}_3$ ) |                          |       |                                        |       |
|-----------------------------------------------|--------------------------|-------|----------------------------------------|-------|
| Pressure<br>(bar)                             | Gravimetric uptake (wt%) |       | Volumetric uptake (kg/m <sup>3</sup> ) |       |
|                                               | excess                   | total | excess                                 | total |
| 1                                             | 2.60                     | 2.60  | 26.94                                  | 26.95 |
| 5                                             | 3.20                     | 3.21  | 33.37                                  | 33.43 |
| 10                                            | 3.39                     | 3.40  | 35.38                                  | 35.48 |
| 20                                            | 3.56                     | 3.57  | 37.26                                  | 37.41 |
| 30                                            | 3.70                     | 3.72  | 38.77                                  | 38.97 |
| 40                                            | 3.75                     | 3.77  | 39.27                                  | 39.51 |
| 50                                            | 3.82                     | 3.85  | 40.13                                  | 40.43 |
| 100                                           | 3.94                     | 3.94  | 41.37                                  | 41.94 |

### S.8 H<sub>2</sub> adsorption sites in lithium-organic pillared graphite

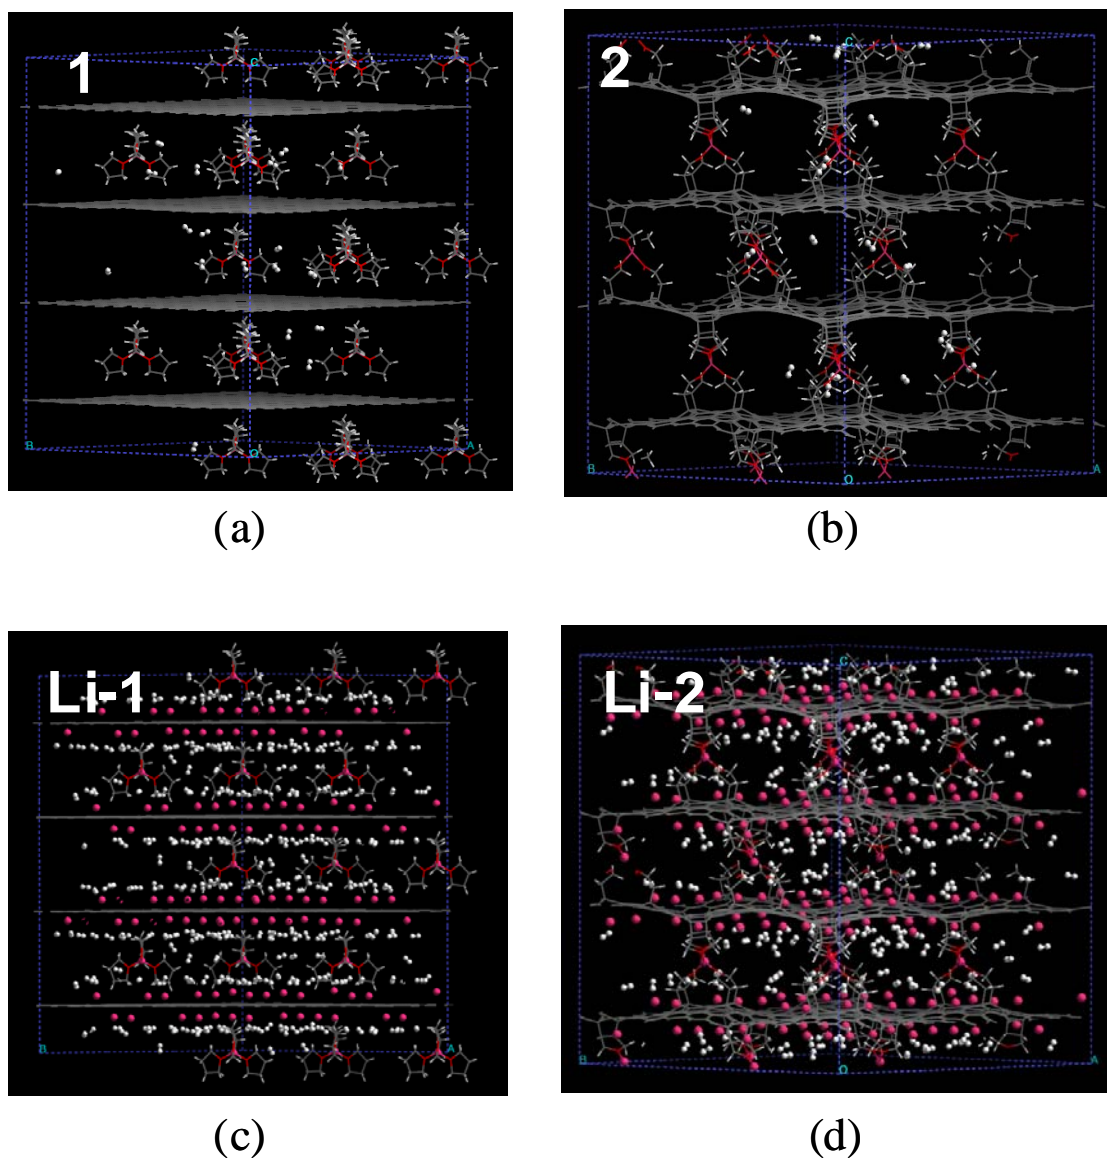

**Figure S2.** GCMC snapshots of the structures of compounds **1** (a), **2** (b), **Li-1** (c), and **Li-2** (d) with adsorbed H<sub>2</sub> at 20 bar and 300 K. Here, the atoms are colored as follows: gray = C, red = O, pink = Li, and white = H. Note that H<sub>2</sub> molecules are adsorbed with a two-layer form in an interlayer space between two graphene layers, and most H<sub>2</sub> is positioned in a parallel orientation rather than in a vertical orientation.

## S.9 References

- [1] W. -Q. Deng, X. Xu, W. A. Goddard III, *Phys. Rev. Lett.*, 2004, **92**, 166103.
- [2] S. S. Han, W. Q. Deng, W. A. Goddard, *Angew. Chem. Int. Ed.*, 2007, **46**, 6289.
- [3] S. S. Han, H. Furukawa, O. M. Yaghi, and W. A. Goddard III, *J. Am. Chem. Soc.*, 2008, **130**, 11580.
- [4] S. S. Han and W. A. Goddard III, *J. Am. Chem. Soc.*, 2007, **129**, 8422.
- [5] S. S. Han and W. A. Goddard III, *J. Phys. Chem. C*, 2007, **111**, 15185.
- [6] S. S. Han and W. A. Goddard III, *J. Phys. Chem. C*, 2008, **112**, 13431.
- [7] S. S. Han, J. L. Mendoza-Cortés, and W. A. Goddard III, *Chem. Soc. Rev.*, 2009, **38**, 1460.
